# Supplementary material for: Fly Ash from Lignite Combustion as a Filler for Rubber Mixes. Part I: Physical Valorization of Fly Ash
Source: MDPI journal article supplement (doi:10.3390/ma15144869), 2022-07-13
Supplement: s1 [file s1]

28<sup>th</sup> of June, 2022

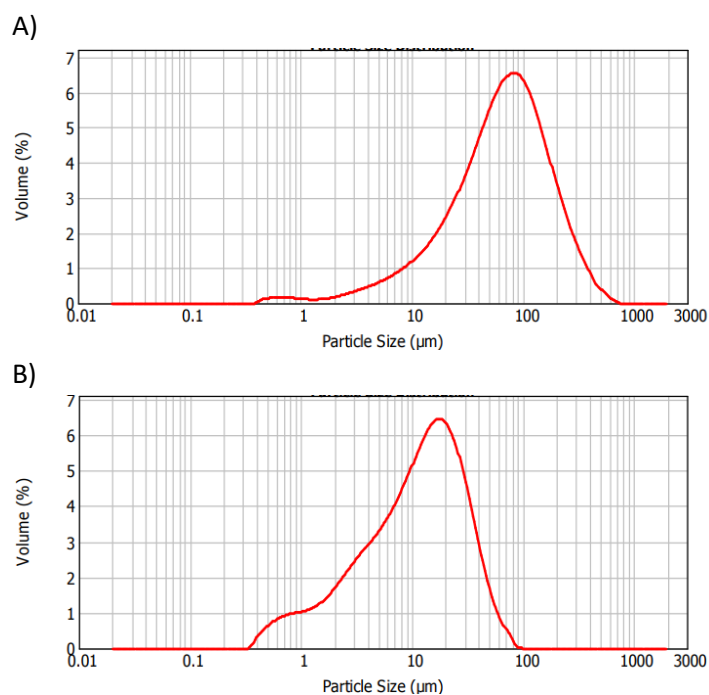

**Figure S1.** Particle size distribution analysis for fly ash sample FA-B 2018: A) before grinding, B) after 4 hrs grinding.

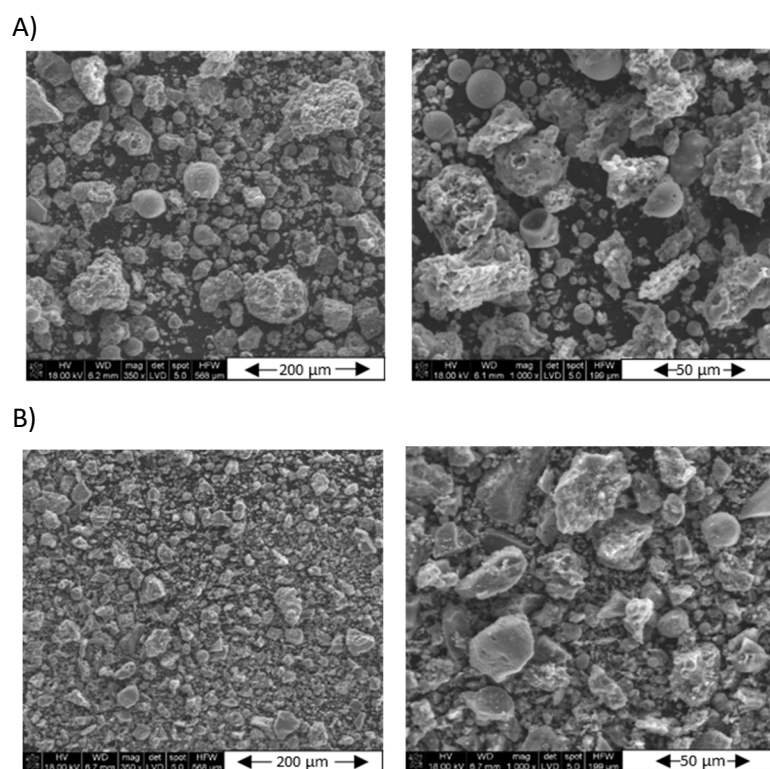

**Figure S2.** SEM morphology of the fly ash sample FA-B 2018: A) before grinding, B) after 4 hrs grinding.

**Table S1.** Qualitative and quantitative “oxide” analysis of fly ash sample FA-B 2018.

| No.                      | Component                      | Content [wt. %] |
|--------------------------|--------------------------------|-----------------|
| 1                        | SiO <sub>2</sub>               | 37.7            |
| 2                        | Al <sub>2</sub> O <sub>3</sub> | 26.4            |
| 3                        | CaO                            | 20.9            |
| 4                        | Fe <sub>2</sub> O <sub>3</sub> | 7.38            |
| 5                        | TiO <sub>2</sub>               | 0.89            |
| 6                        | SO <sub>3</sub>                | 2.74            |
| 7                        | MgO                            | 1.01            |
| 8                        | K <sub>2</sub> O               | 0.11            |
| 9                        | P <sub>2</sub> O <sub>5</sub>  | 0.44            |
| 10                       | SrO                            | 0.06            |
| 11                       | BaO                            | 0.05            |
| 12                       | Mn <sub>3</sub> O <sub>4</sub> | 0.05            |
| 13                       | Na <sub>2</sub> O              | 0.04            |
| SUM                      |                                | 99.03           |
| Loss on Ignition [wt. %] |                                | 1.26            |

**Table S2.** Phase composition for fly ash sample FA-B 2018.

| No. | Component                                                                                                                                                         | Content [wt. %] |
|-----|-------------------------------------------------------------------------------------------------------------------------------------------------------------------|-----------------|
| 1   | Low silicon dioxide (SiO <sub>2</sub> )                                                                                                                           | 14.3            |
| 2   | Akermanite (Ca <sub>2</sub> Mg[Si <sub>2</sub> O <sub>7</sub> ])-<br>Gehlenite (Ca <sub>2</sub> Al[(Si,Al) <sub>2</sub> O <sub>7</sub> ])                         | 41.8            |
| 3   | Andesine<br>Sodium aluminosilicate<br>(NaAlSi <sub>3</sub> O <sub>8</sub> ) and<br>Calcium aluminosilicate<br>(CaAl <sub>2</sub> Si <sub>2</sub> O <sub>8</sub> ) | 29.6            |
| 4   | Potassium aluminosilicate<br>(AlK <sub>6</sub> Si <sub>2</sub> )                                                                                                  | 6.0             |
| 5   | Mayenite (Ca <sub>12</sub> Al <sub>14</sub> O <sub>3</sub> )                                                                                                      | 6.3             |
| 6   | Leucite (K[AlSi <sub>2</sub> O <sub>6</sub> ])                                                                                                                    | 1.0             |
| 7   | Zeolite MCM-70                                                                                                                                                    | 1.1             |

**Table S3.** SEM-EDS analysis of the chemical composition of the fly ash FFA-B 2018 fractions in terms of the content of oxides and carbon.

| <i>Grain size/fraction</i> | <b>Σ oxides [wt. %]</b> | <b>Carbon [wt. %]</b> |
|----------------------------|-------------------------|-----------------------|
| <i>FA-63</i>               | 85.6                    | 14.4                  |
| <i>FA-125</i>              | 72.7                    | 27.3                  |
| <i>FA-250</i>              | 62.9                    | 37.1                  |
| <i>FA&gt;0.250</i>         | 49.1                    | 50.9                  |

**Table S4.** “Oxide” analysis of the fly ash FFA-B 2018 fractions.

| <i>Fraction/<br/>component</i>     | <b>FA-63<br/>[wt. %]</b> | <b>FA-125<br/>[wt. %]</b> | <b>FA-250<br/>[wt. %]</b> | <b>FA&gt;0.250<br/>[wt.%]</b> |
|------------------------------------|--------------------------|---------------------------|---------------------------|-------------------------------|
| <i>SiO<sub>2</sub></i>             | 20.618                   | 25.223                    | 25.471                    | 18.207                        |
| <i>CaO</i>                         | 27.941                   | 17.489                    | 11.772                    | 9.245                         |
| <i>Al<sub>2</sub>O<sub>3</sub></i> | 19.160                   | 18.911                    | 16.865                    | 11.620                        |
| <i>Fe<sub>2</sub>O<sub>3</sub></i> | 8.897                    | 5.931                     | 4.753                     | 4.168                         |
| <i>SO<sub>3</sub></i>              | 6.076                    | 2.462                     | 1.534                     | 3.213                         |
| <i>TiO<sub>2</sub></i>             | 0.941                    | 1.192                     | 1.246                     | 1.239                         |
| <i>MgO</i>                         | 0.914                    | 0.065                     | 0.459                     | 0.326                         |

**Table S5.** Phase composition of various fractions of the fly ash FFA-B 2018 sample.

| <i>Fraction/<br/>Component</i>                                                                                                                       | <b>FA-63<br/>[wt.%]</b> | <b>FA-125<br/>[wt.%]</b> | <b>FA-250<br/>[wt.%]</b> | <b>FA&gt;0.250<br/>[wt.%]</b> |
|------------------------------------------------------------------------------------------------------------------------------------------------------|-------------------------|--------------------------|--------------------------|-------------------------------|
| <i>Quartz (SiO<sub>2</sub>)</i>                                                                                                                      | 10.0                    | 23.8                     | 39.2                     | 46.9                          |
| <i>Akermanite/<br/>Gehlenite<br/>Ca<sub>2</sub>Mg(Si<sub>2</sub>O<sub>7</sub>)<br/>Ca<sub>2</sub>Al[(Si<sub>2</sub>Al)<sub>2</sub>O<sub>7</sub>]</i> | 30.9                    | 13.1                     | 9.1                      | 4.1                           |
| <i>Albite NaAlSi<sub>3</sub>O<sub>8</sub></i>                                                                                                        | 20.0                    | 24.0                     | 19.2                     | 11.7                          |
| <i>Limestone CaO</i>                                                                                                                                 | 6.6                     | 1.3                      | -                        | -                             |
| <i>Calcite CaCO<sub>3</sub></i>                                                                                                                      | 2.2                     | 1.3                      | 1.2                      | -                             |
| <i>Hematite α-Fe<sub>2</sub>O<sub>3</sub></i>                                                                                                        | 5.0                     | 1.6                      | 1.3                      | -                             |
| <i>Anhydrite CaSO<sub>4</sub></i>                                                                                                                    | 10.0                    | 2.2                      | 2.1                      | 1.8                           |
| <i>Brownmillerite<br/>Ca<sub>2</sub>(Al<sub>2</sub>Fe)<sub>2</sub>O<sub>5</sub></i>                                                                  | 6.0                     | 1.7                      | 2.0                      | -                             |
| <i>Mullite 3Al<sub>2</sub>O<sub>3</sub>·2SiO<sub>2</sub></i>                                                                                         | 9.4                     | 30.9                     | 25.9                     | 35.5                          |

**Table S6.** Specific surface area analysis of fly ash FA-B 2018 sample.

| <i>Sample</i> | <b>CTAB [m<sup>2</sup>/g]</b> | <b>BET [m<sup>2</sup>/g]</b> | <b>BET [m<sup>2</sup>/g] after grinding</b> |
|---------------|-------------------------------|------------------------------|---------------------------------------------|
| <i>FA-B</i>   | 4.0±0.1                       | 11.1±0.1                     | 11.3±0.1                                    |

**Table S7.** Results of the BET surface area for fly ash FFA-B 2018 sample divided into fractions.

| <i>Fraction</i>    | <b>BET [m<sup>2</sup>/g]</b> |
|--------------------|------------------------------|
| <i>FA-63</i>       | 5.3                          |
| <i>FA-125</i>      | 10.5                         |
| <i>FA-250</i>      | 17.6                         |
| <i>FA&gt;0.250</i> | 45.1                         |

**Table S8.** Surface energy of fly ash FA-B 2018 sample.

| <b>Surface energy [mJ/m<sup>2</sup>]</b> |      |
|------------------------------------------|------|
| <i>Dispersive component</i>              | 22.6 |
| <i>Polar component</i>                   | 11.7 |
| <i>Total value</i>                       | 34.3 |
